# Supplementary material for: Magnetic anisotropy of two tetrahedral Co(ii)-halide complexes with triphenylphosphine ligands
Source: Royal Society of Chemistry journal article supplement (doi:10.1039/d2dt00121g), 2022-01-01
Supplement: d2dt00121g1.pdf [file d2dt00121g1.pdf]

## **Magnetic anisotropy of two tetrahedral Co(II)-halide complexes with triphenylphosphine ligands**

Wei Lv,<sup>a</sup> Hui-Hui Cui,<sup>a</sup> Lei Chen,<sup>b</sup> Yi-Quan Zhang,<sup>\*c</sup> Xue-Tai Chen,<sup>\*a</sup> Zhenxing Wang,<sup>\*d</sup> Zhong-Wen Ouyang<sup>d</sup> and Zi-Ling Xue<sup>e</sup>

<sup>a</sup>*State Key Laboratory of Coordination Chemistry, School of Chemistry and Chemical Engineering, Nanjing University, Nanjing 210023, China*

<sup>b</sup>*School of Environmental and Chemical Engineering, Jiangsu University of Science and Technology, Zhenjiang 212003, China*

<sup>c</sup>*Jiangsu Key Laboratory for NSLSCS, School of Physical Science and Technology, Nanjing Normal University, Nanjing 210023, China*

<sup>d</sup>*Wuhan National High Magnetic Field Center & School of Physics, Huazhong University of Science and Technology, Wuhan 430074, China*

<sup>e</sup>*Department of Chemistry, University of Tennessee, Knoxville, Tennessee 37996, USA*

### ***Electronic Supplementary Information***

**Table S1** Complexes with [CoAB<sub>3</sub>] moiety and their structure/magnetic parameters

| Complex <sup>a</sup>                               | Coordination moiety   | <i>D</i> /cm <sup>-1</sup> | <i>E</i>  /cm <sup>-1</sup> | <i>U</i> <sub>eff</sub> / K <sup>b</sup> | Reference |
|----------------------------------------------------|-----------------------|----------------------------|-----------------------------|------------------------------------------|-----------|
| <b>1</b>                                           | [CoPCl <sub>3</sub> ] | +42.8                      | 0                           | c                                        | This work |
| <b>2</b>                                           | [CoPBr <sub>3</sub> ] | +41.2                      | 0                           | c                                        | This work |
| [Co(L <sup>1</sup> )Cl <sub>3</sub> ] ( <b>3</b> ) | [CoNCl <sub>3</sub> ] | +19.9                      | 3.37                        | d                                        | 18        |
| [L <sup>2</sup> CoCl] <sup>+</sup> ( <b>4</b> )    | [CoN <sub>3</sub> Cl] | +12.7                      | 1.2                         | 34.5 (1500 Oe)                           | 19        |
| K[Co(L <sup>3</sup> )] ( <b>5</b> )                | [CoNN' <sub>3</sub> ] | +33                        | 0.2                         | 45 (1000 Oe)                             | 20        |
| [Co(L <sup>4</sup> )] ( <b>6</b> )                 | [CoNN' <sub>3</sub> ] | +16                        | 0.0                         | 12.5 (1500 Oe)                           | 21        |
| [LiTHF][Co(L <sup>5</sup> )] ( <b>7</b> )          | [CoNN' <sub>3</sub> ] | +27                        | 4.0                         | 26 (1000 Oe)                             | 22        |

a. Ligands: L<sup>1</sup> = 2-methyl-3-(pyridin-2-yl)imidazo[1,5-a]pyridinium cation; L<sup>2</sup> = CH<sub>3</sub>C[CH<sub>2</sub>N=CN(CH<sub>3</sub>)<sub>2</sub>]<sub>3</sub>; L<sup>3</sup> = N,N',N''-[nitrilotris-(ethane-2,1-diyl)]tris(2,4,6-trimethylbenzenesulfonamide); L<sup>4</sup> = N[CH<sub>2</sub>C(O)NC(CH<sub>3</sub>)<sub>3</sub>]<sub>3</sub>; L<sup>5</sup> = [(Me<sub>3</sub>SiNCH<sub>2</sub>CH<sub>2</sub>)<sub>3</sub>N]<sup>3-</sup>. b. The applied field used in the measurement is indicated in the parenthesis. c. No Orbach mechanism is found. d. Not reported.

**Table S2** Complexes with [CoP<sub>2</sub>X<sub>2</sub>] moiety and their structure/magnetic parameters

| Complex                                                                | Coordination moiety                 | <i>D</i> /cm <sup>-1</sup> | <i>E</i>   /cm <sup>-1</sup> | <i>U</i> <sub>eff</sub> / K <sup>c</sup> | Reference |
|------------------------------------------------------------------------|-------------------------------------|----------------------------|------------------------------|------------------------------------------|-----------|
| [Co(PPh <sub>3</sub> ) <sub>2</sub> Cl <sub>2</sub> ] ( <b>8</b> )     | [CoP <sub>2</sub> Cl <sub>2</sub> ] | -16.2                      | 0.9                          | 37.1 (1000 Oe)                           | 23        |
| [Co(L <sup>6</sup> )Cl <sub>2</sub> ] ( <b>9</b> )                     | [CoP <sub>2</sub> Cl <sub>2</sub> ] | -14.4                      | 1.7                          | 35.0 (1000 Oe)                           | 23        |
| [Co(L <sup>7</sup> )Cl <sub>2</sub> ] ( <b>10</b> )                    | [CoP <sub>2</sub> Cl <sub>2</sub> ] | -15.4                      | 1.3                          | 29.9 (1000 Oe)                           | 23        |
| [Co(PPh <sub>3</sub> ) <sub>2</sub> Br <sub>2</sub> ] ( <b>11</b> )    | [CoP <sub>2</sub> Br <sub>2</sub> ] | -13                        | --                           | 37 (1000 Oe)                             | 24        |
| [Co(PPh <sub>3</sub> ) <sub>2</sub> I <sub>2</sub> ] ( <b>12</b> )     | [CoP <sub>2</sub> I <sub>2</sub> ]  | -36.9                      | 0.2                          | 30.6 (1000 Oe)                           | 25        |
| [Co(PPh <sub>3</sub> ) <sub>2</sub> (NCS) <sub>2</sub> ] ( <b>13</b> ) | [CoP <sub>2</sub> N <sub>2</sub> ]  | -9.44                      | 1.60                         | b                                        | 26        |
| [Co(L <sup>8</sup> )(NCS) <sub>2</sub> ] ( <b>14</b> )                 | [CoP <sub>2</sub> N <sub>2</sub> ]  | -11.4                      | 0.46                         | 31.8 (3000 Oe)                           | 27        |
| [Co(L <sup>9</sup> )(NCS) <sub>2</sub> ] ( <b>15</b> )                 | [CoP <sub>2</sub> N <sub>2</sub> ]  | -16.2                      | 1.1                          | 30.1 (1000 Oe)                           | 28        |
| [Co(L <sup>9</sup> )Cl <sub>2</sub> ] ( <b>16</b> )                    | [CoP <sub>2</sub> Cl <sub>2</sub> ] | -15.1                      | 0.9                          | 25.5 (1000 Oe)                           | 28        |
| [Co(L <sup>9</sup> )Br <sub>2</sub> ] ( <b>17</b> )                    | [CoP <sub>2</sub> Br <sub>2</sub> ] | -11.6                      | 1.2                          | 18.7 (1000 Oe)                           | 28        |
| [Co(L <sup>9</sup> )I <sub>2</sub> ] ( <b>18</b> )                     | [CoP <sub>2</sub> I <sub>2</sub> ]  | -7.3                       | 1.5                          | 9.2 (1000 Oe)                            | 28        |
| [CoCl <sub>2</sub> (dppf)] ( <b>19</b> )                               | [CoP <sub>2</sub> Cl <sub>2</sub> ] | -11.0                      | 0                            | 33.3 (1000 Oe)                           | 29        |
| [CoBr <sub>2</sub> (dppf)] ( <b>20</b> )                               | [CoP <sub>2</sub> Br <sub>2</sub> ] | -8.7                       | 2.09                         | 28.8 (1000 Oe)                           | 29        |

a. Ligands: L<sup>6</sup> = DPEphos = 2,2'-bis(diphenyl-phosphino) diphenyl ether; L<sup>7</sup> = Xantphos = 9,9-dimethyl-4,5-bis(diphenyl-phosphino) xanthenes; L<sup>8</sup> = bis(2-(diphenylphosphanyl)-4-methylphenyl)amine; L<sup>9</sup> = 9,9-dimethyl-4,5-bis(diphenylphosphino)xanthenes; dppf = 1,1'-ferrocenediyl-bis(diphenylphosphine). b. Not reported. c. The applied field used in the measurement is indicated in the parenthesis.

**Table S3** Summary of crystal data and refinement for **1** and **2**

|                                                                            | <b>1</b>                                             | <b>2</b>                                             |
|----------------------------------------------------------------------------|------------------------------------------------------|------------------------------------------------------|
| Molecular formula                                                          | C <sub>26</sub> H <sub>35</sub> NPCl <sub>3</sub> Co | C <sub>26</sub> H <sub>35</sub> NPBr <sub>3</sub> Co |
| CCDC no                                                                    | 2074688                                              | 2074732                                              |
| Formula weight                                                             | 557.80                                               | 691.18                                               |
| Temperature/K                                                              | 296(2)                                               | 296(2)                                               |
| Crystal system                                                             | Cubic                                                | Cubic                                                |
| Space group                                                                | <i>Pa</i>                                            | <i>Pa</i>                                            |
| <i>a</i> / Å                                                               | 17.5892(2)                                           | 17.86950(10)                                         |
| <i>b</i> / Å                                                               | 17.5892(2)                                           | 17.86950(10)                                         |
| <i>c</i> / Å                                                               | 17.5892(2)                                           | 17.86950(10)                                         |
| $\alpha$ (°)                                                               | 90                                                   | 90                                                   |
| $\beta$ (°)                                                                | 90                                                   | 90                                                   |
| $\gamma$ (°)                                                               | 90                                                   | 90                                                   |
| <i>V</i> / Å <sup>3</sup>                                                  | 5441.75(19)                                          | 5706.17(10)                                          |
| <i>Z</i>                                                                   | 8                                                    | 8                                                    |
| D <sub>calc</sub> , g/cm <sup>3</sup>                                      | 1.362                                                | 1.609                                                |
| $\mu$ / mm <sup>-1</sup>                                                   | 0.999                                                | 4.873                                                |
| F (000)                                                                    | 2328.0                                               | 2760.0                                               |
| $\theta$ range [°]                                                         | 2.005/25.977                                         | 1.974/25.974                                         |
| Reflns collected                                                           | 42768                                                | 45367                                                |
| R <sub>int</sub>                                                           | 0.0574                                               | 0.0608                                               |
| Indep. reflns                                                              | 1795                                                 | 1869                                                 |
| Data/restr./paras                                                          | 1795/215/149                                         | 1869/203/149                                         |
| Goodness-of-fit on <i>F</i> <sup>2</sup>                                   | 1.064                                                | 1.094                                                |
| R <sub>1</sub> , wR <sub>2</sub> [ <i>I</i> > 2σ( <i>I</i> )] <sup>a</sup> | 0.0600/0.1565                                        | 0.0750/0.1755                                        |
| R <sub>1</sub> , wR <sub>2</sub> [all data] <sup>a</sup>                   | 0.0740/0.1700                                        | 0.0946/0.1889                                        |

$$^a wR_2 = [\Sigma[w(F_o^2 - F_c^2)^2] / \Sigma[w(F_o^2)^2]]^{1/2}, R_1 = \Sigma||F_o| - |F_c|| / \Sigma|F_o|.$$

**Table S4** Selected bond lengths (Angstroms) and angles (degree) for **1** and **2**

|             | <b>1</b>   |             | <b>2</b>   |
|-------------|------------|-------------|------------|
| Co1-P1      | 2.3763(16) | Co1-P1      | 2.373(3)   |
| Co1-Cl1     | 2.2508(12) | Co1-Br1     | 2.3827(10) |
| Cl1-Co1-Cl1 | 114.11(4)  | Br1-Co1-Br1 | 113.39(4)  |
| P1-Co1-Cl1  | 104.30(5)  | P1-Co1-Br1  | 105.19(5)  |

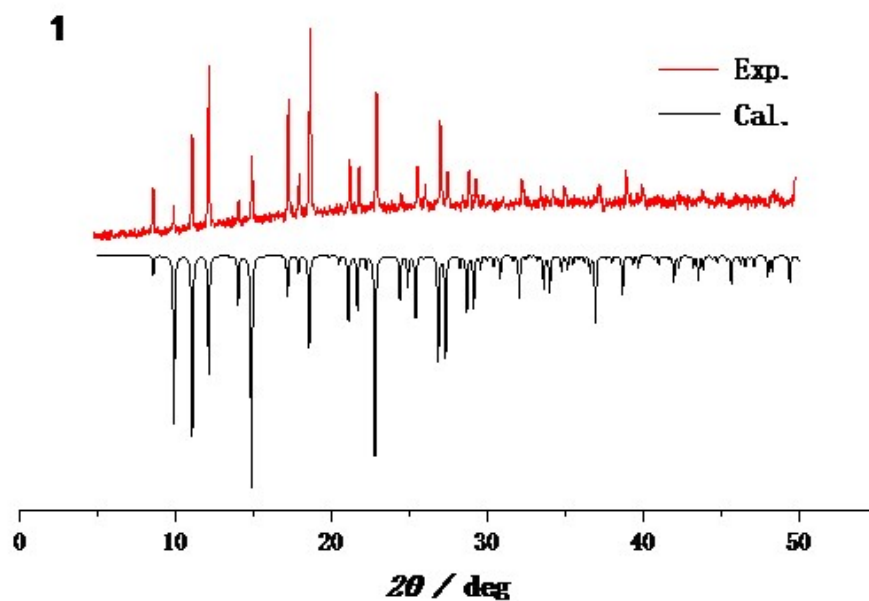

**Fig. S1** XRD patterns for **1** (The red line are PXRD experimental pattern and the black line are calculated from single-crystal structure)

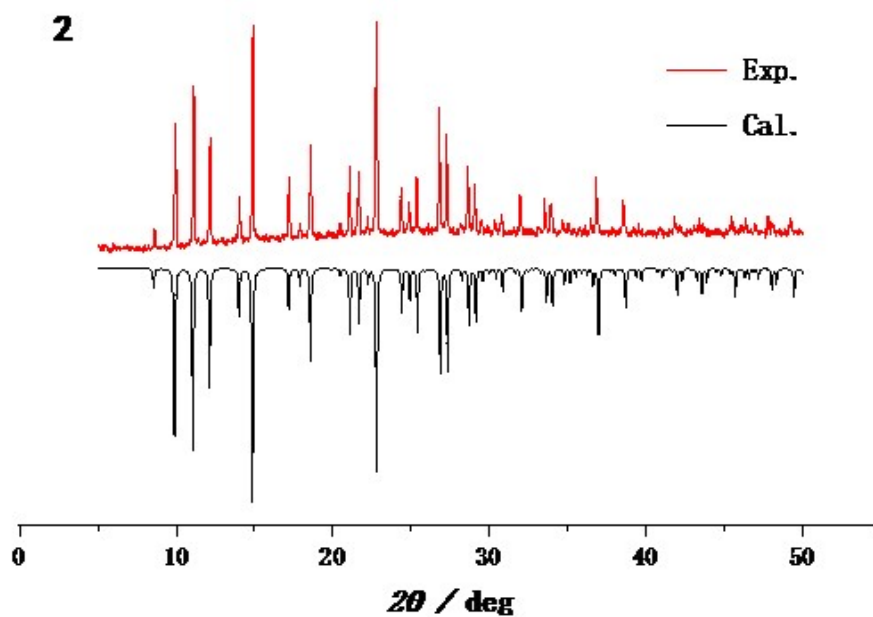

**Fig. S2** XRD patterns for complex **2** (The red line are PXRD experimental pattern and the black line are calculated from single-crystal structure).

**Table S4** The results of the continuous shape measure (*CShM*) analyses of **1** and **2** by SHAPE software.<sup>1,2</sup>

| Four-vertex | Deviation parameter |             |        |                           |
|-------------|---------------------|-------------|--------|---------------------------|
|             | Square              | Tetrahedron | Seesaw | Vacant trigonal bipyramid |
| 1           | 33.432              | 0.177       | 8.903  | 2.258                     |
| 2           | 33.417              | 0.199       | 8.889  | 2.112                     |

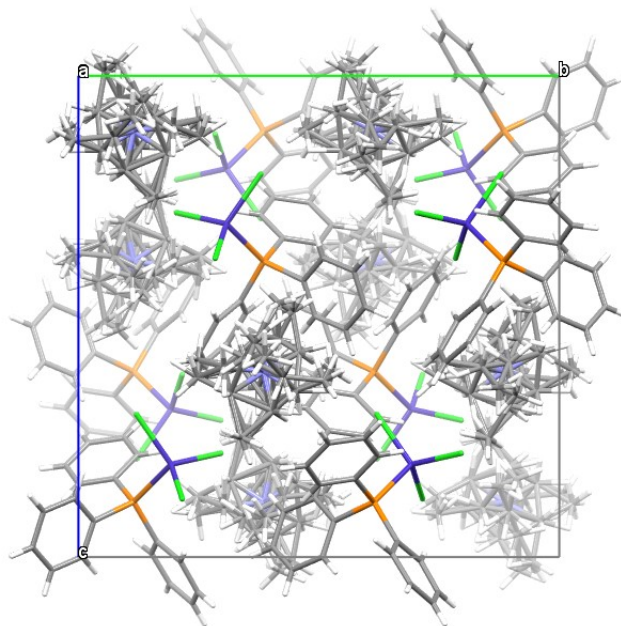

**Fig. S3** Crsytal packing of **1** along the crystallographic a-axis.

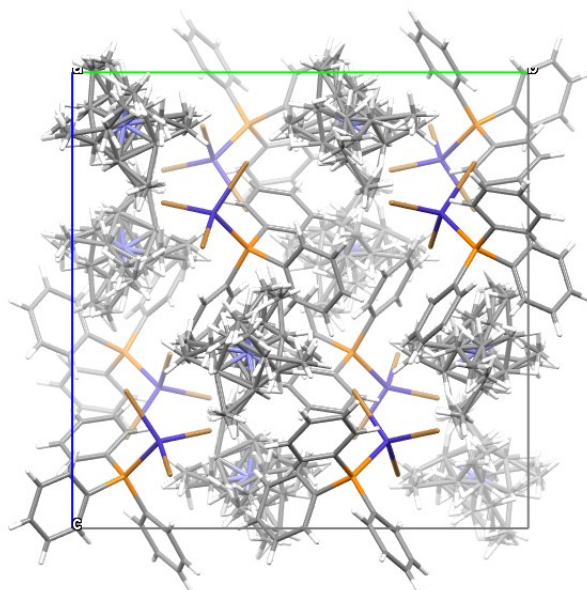

**Fig. S4** Crystal packing of **2** along the crystallographic a-axis.

**PHI survey plots:** In order to check the accuracy of the set of the fitted parameters, survey features have been performed using the PHI code.<sup>3</sup> Among the three parameters  $D$ ,  $g_x(g_y)$  and  $g_z$ , one parameter was fixed and the other two are varied. All the survey plots show that the fitted parameters are in the narrow minimum regions.

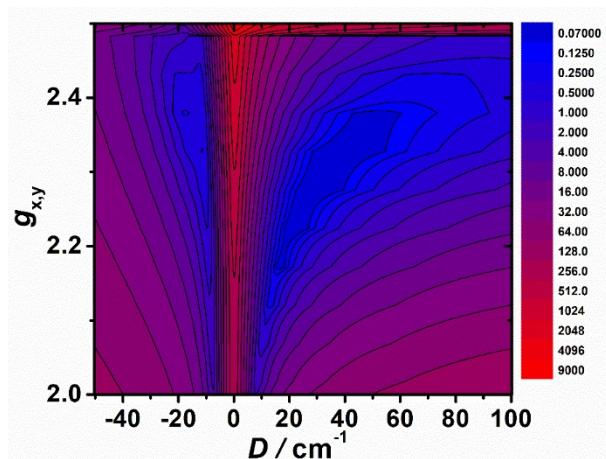

(a)

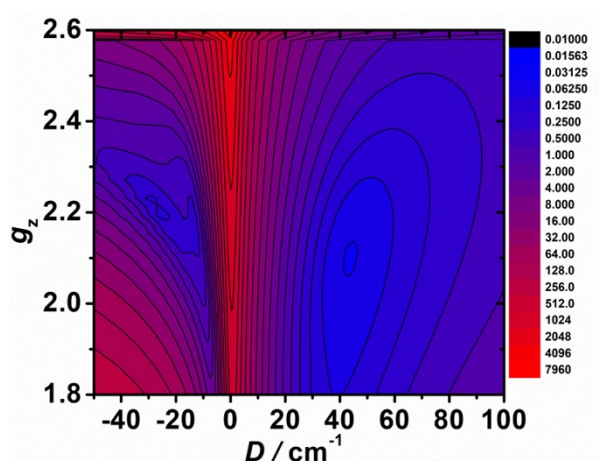

(b)

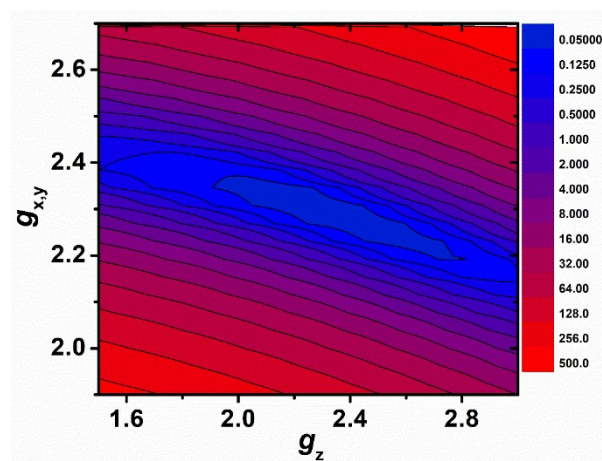

(c)

**Fig. S5** The survey plots of complex 1: (a)  $g_z$  was fixed as 2.103; (b)  $g_x(g_y)$  was fixed as 2.236 and (c)  $D$  was fixed as  $42.8 \text{ cm}^{-1}$ .

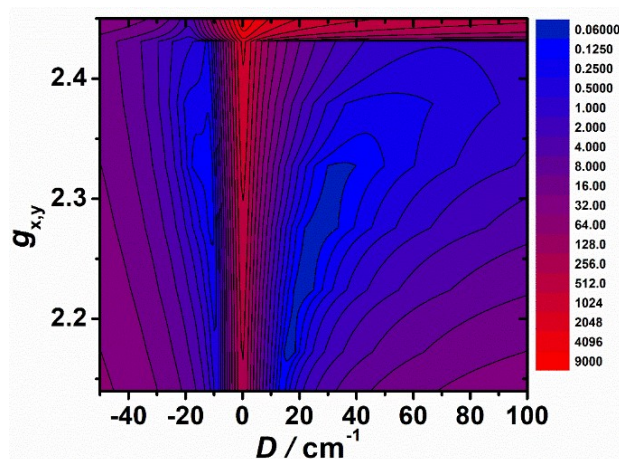

(a)

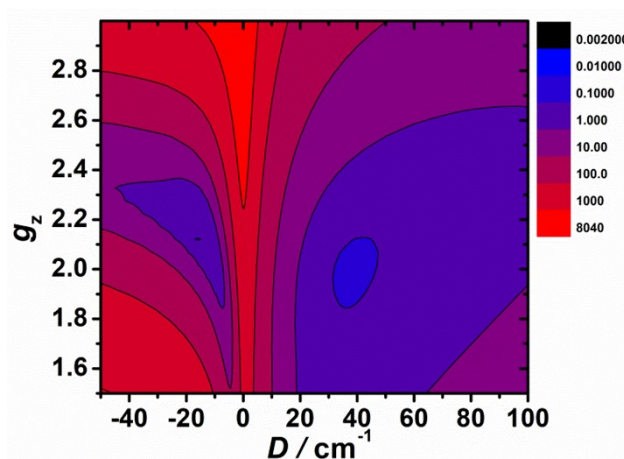

(b)

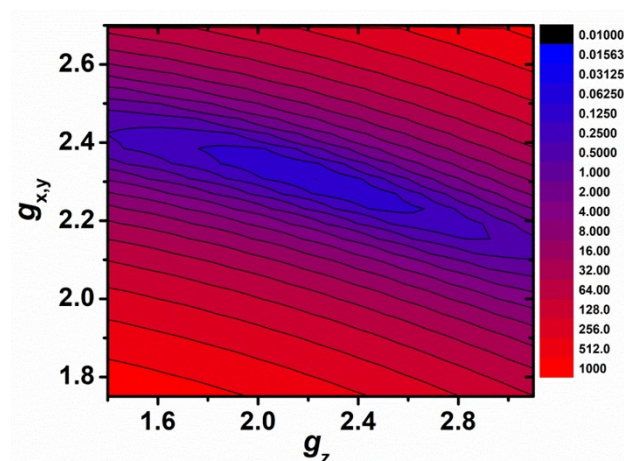

(c)

**Fig. S6** The survey plots of complex 2: (a)  $g_z$  was fixed as 2.136; (b)  $g_x(g_y)$  was fixed as 2.262 and (c)  $D$  was fixed as  $41.2 \text{ cm}^{-1}$ .



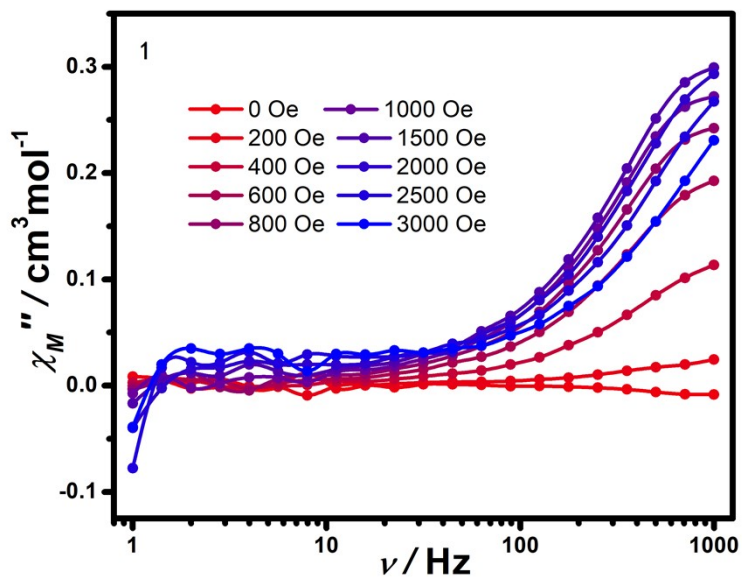

(a)

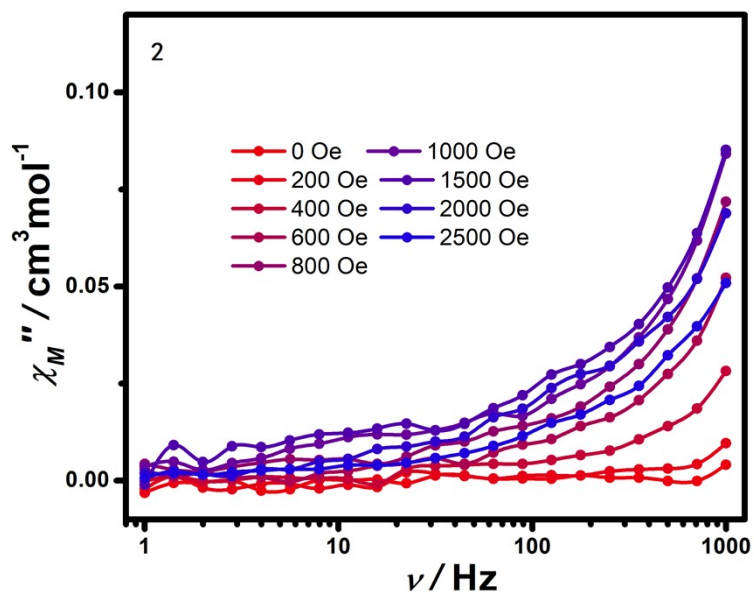

(b)

**Fig. S7** Frequency dependence of out-of-phase ac susceptibility ( $\chi_M''$ ) at 1.8 K under the different applied static fields from 0 to 0.25 T for **1** (a) and **2** (b). The solid lines are for eye guide.

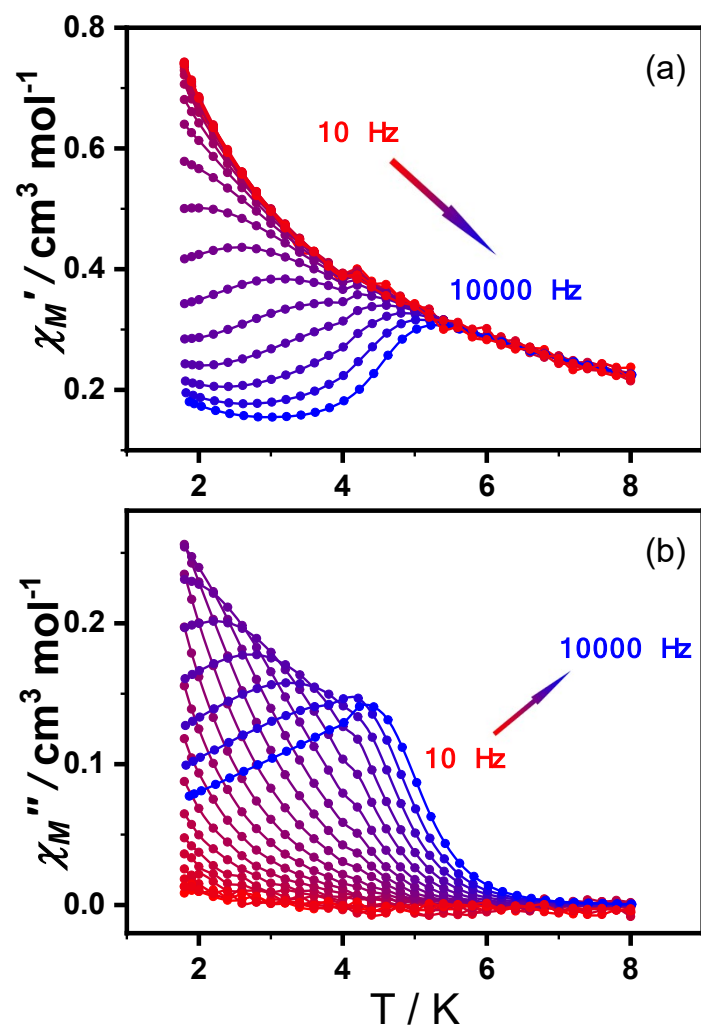

**Fig. S8** Temperature dependence of (a) in-phase ( $\chi_M'$ ) and (b) out-of-phase ac susceptibility ( $\chi_M''$ )

at different ac frequencies under the dc field of 0.12 T for **1**. The solid lines are for eye guide.

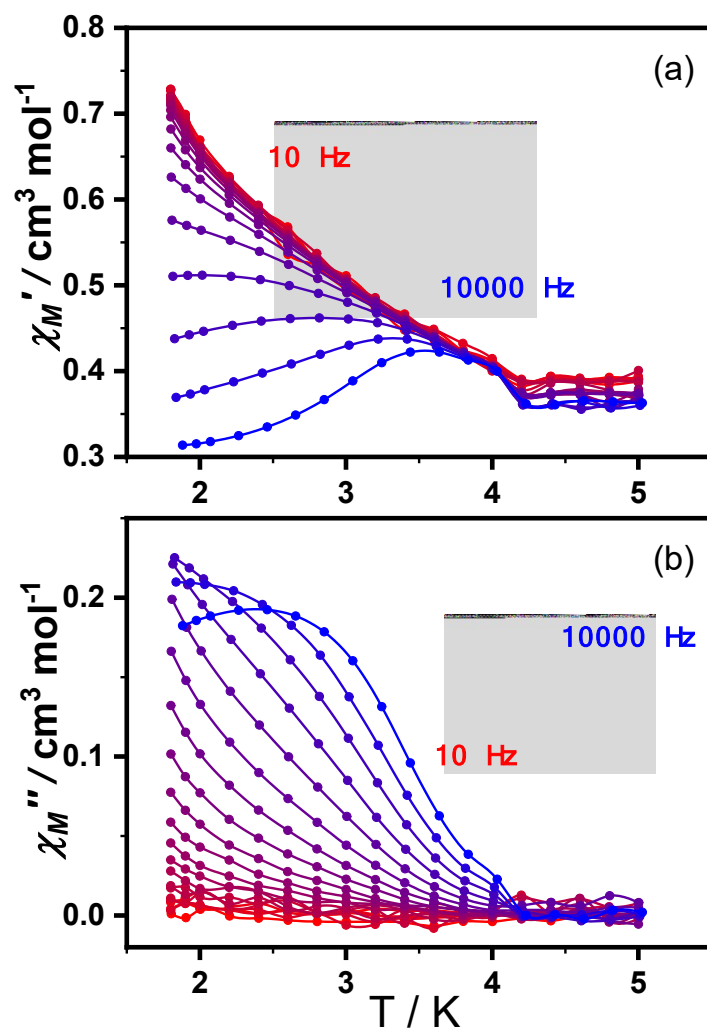

**Fig. S9** Temperature dependence of (a) in-phase ( $\chi_M'$ ) and (b) out-of-phase ac susceptibility ( $\chi_M''$ )

at different ac frequencies under the dc field of 0.15 T for 2. The solid lines are for eye guide.

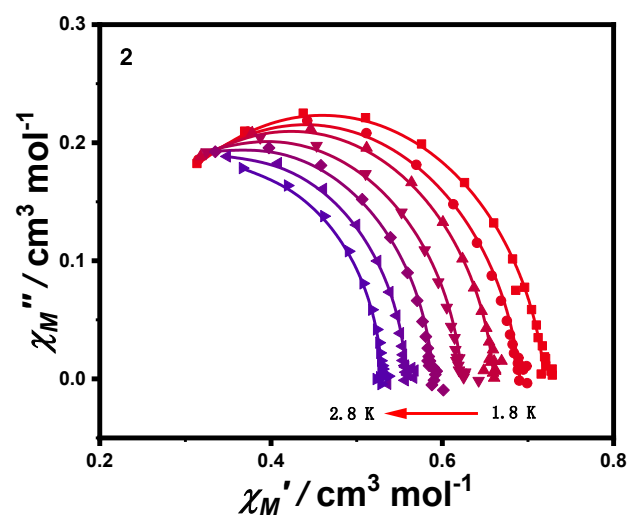

**Fig. S10** Cole–Cole plots for **2** under 0.15 T dc field. The solid lines are the best fits to the experiments with the generalized Debye model.

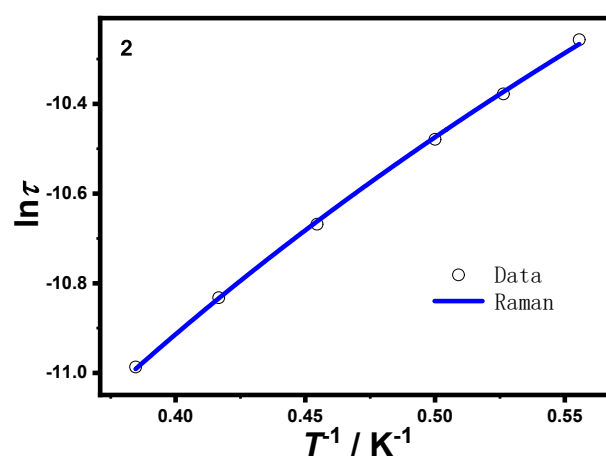

**Fig. S11** The plot of  $\ln(\tau)$  versus  $T^{-1}$  for **2**. The solid blue line represents the best fit by the Raman process.

**Table S5** Relaxation times  $\tau$  (s) and  $\alpha$  values for **1** and **2**

| <b>1</b> |          |          |                          |          |
|----------|----------|----------|--------------------------|----------|
| T (K)    | $\chi_S$ | $\chi_T$ | $\tau$ (s)               | $\alpha$ |
| 1.8      | 0.16775  | 0.7448   | $1.46616 \times 10^{-4}$ | 0.07053  |
| 1.9      | 0.16128  | 0.71303  | $1.33689 \times 10^{-4}$ | 0.0677   |
| 2.0      | 0.1559   | 0.68453  | $1.22337 \times 10^{-4}$ | 0.0625   |
| 2.2      | 0.15031  | 0.66035  | $1.1247 \times 10^{-4}$  | 0.06088  |
| 2.4      | 0.14531  | 0.63827  | $1.03745 \times 10^{-4}$ | 0.05875  |
| 2.6      | 0.14109  | 0.61614  | $9.56154 \times 10^{-5}$ | 0.05418  |
| 2.8      | 0.13704  | 0.5963   | $8.83302 \times 10^{-5}$ | 0.05117  |
| 3.0      | 0.13348  | 0.57683  | $8.16139 \times 10^{-5}$ | 0.04658  |
| 3.2      | 0.12929  | 0.55981  | $7.55874 \times 10^{-5}$ | 0.04619  |
| 3.4      | 0.1259   | 0.5438   | $7.01833 \times 10^{-5}$ | 0.04433  |
| 3.6      | 0.12413  | 0.52708  | $6.51943 \times 10^{-5}$ | 0.03701  |
| 3.8      | 0.12039  | 0.51323  | $6.06515 \times 10^{-5}$ | 0.03822  |
| 4.0      | 0.11787  | 0.49878  | $5.6357 \times 10^{-5}$  | 0.03462  |
| 4.4      | 0.11575  | 0.48508  | $5.2464 \times 10^{-5}$  | 0.03065  |
| 4.8      | 0.11296  | 0.47285  | $4.88591 \times 10^{-5}$ | 0.03029  |
| 5.2      | 0.11133  | 0.45994  | $4.54591 \times 10^{-5}$ | 0.02472  |
| 5.6      | 0.10949  | 0.44831  | $4.23382 \times 10^{-5}$ | 0.02156  |
| 6.0      | 0.10701  | 0.43822  | $3.93648 \times 10^{-5}$ | 0.02217  |
| 6.4      | 0.10504  | 0.42854  | $3.65816 \times 10^{-5}$ | 0.02144  |
| 6.8      | 0.1026   | 0.4181   | $3.37456 \times 10^{-5}$ | 0.01988  |
| 7.2      | 0.1023   | 0.40843  | $3.12653 \times 10^{-5}$ | 0.01367  |
| 7.6      | 0.1009   | 0.39929  | $2.87198 \times 10^{-5}$ | 0.01058  |
| 8.0      | 0.09871  | 0.39092  | $2.61773 \times 10^{-5}$ | 0.01048  |
| <b>2</b> |          |          |                          |          |
| T (K)    | $\chi_S$ | $\chi_T$ | $\tau$ (s)               | $\alpha$ |

|     |                          |         |                          |                          |
|-----|--------------------------|---------|--------------------------|--------------------------|
| 1.8 | 0.20105                  | 0.71947 | $3.51115 \times 10^{-5}$ | 0.08591                  |
| 1.9 | 0.18959                  | 0.6906  | $3.11135 \times 10^{-5}$ | 0.08737                  |
| 2.0 | 0.18673                  | 0.66015 | $2.81235 \times 10^{-5}$ | 0.06759                  |
| 2.2 | 0.16967                  | 0.62287 | $2.32724 \times 10^{-5}$ | 0.06667                  |
| 2.4 | 0.16144                  | 0.58927 | $1.97552 \times 10^{-5}$ | 0.05378                  |
| 2.6 | 0.15936                  | 0.5578  | $1.69242 \times 10^{-5}$ | 0.03441                  |
| 2.8 | 0.15789                  | 0.52916 | $1.41798 \times 10^{-5}$ | 0.01963                  |
| 3.0 | 0.14601                  | 0.50458 | $1.08899 \times 10^{-5}$ | 0.02683                  |
| 3.2 | 0.14768                  | 0.48031 | $8.20644 \times 10^{-6}$ | 0.01659                  |
| 3.4 | 0.16043                  | 0.45787 | $6.05389 \times 10^{-6}$ | $8.27505 \times 10^{-4}$ |
| 3.6 | 0.22726                  | 0.44122 | $5.30153 \times 10^{-6}$ | 0.00112                  |
| 4.0 | 0.00937                  | 0.4237  | $1.14426 \times 10^{-6}$ | 0.11771                  |
| 4.2 | $1.98419 \times 10^{-7}$ | 0.40805 | $3.95027 \times 10^{-7}$ | 0.23328                  |
| 4.4 | $3.04973 \times 10^{-7}$ | 0.39081 | $1.97231 \times 10^{-7}$ | 0.24095                  |
| 4.6 | $1.94707 \times 10^{-6}$ | 0.37507 | $1.37693 \times 10^{-7}$ | 0.19865                  |
| 4.8 | $9.15375 \times 10^{-6}$ | 0.36211 | $2.40381 \times 10^{-8}$ | 0.34942                  |
| 5.0 | $1.77633 \times 10^{-5}$ | 0.34628 | $1.55948 \times 10^{-7}$ | $7.46318 \times 10^{-9}$ |

## Computation Details

Complete active space second-order multiconfigurational perturbation theory (CASPT2) considering the effect of the dynamic electron correlation with MOLCAS 8.4 program package<sup>4</sup> was performed on the basis of single-crystal X-ray determined geometries of **1** and **2** (see Fig. S8 for the calculated model structures of **1** and **2**).

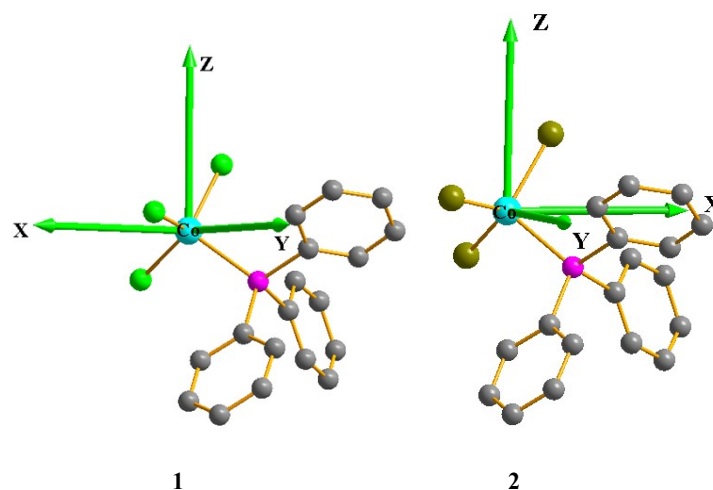

**Fig. S12** Calculated model structures of individual Co<sup>II</sup> fragments. H atoms are omitted for clarity.

For the first complete-active-space self-consistent field (CASSCF) calculation, the basis sets for all atoms are atomic natural orbitals from the MOLCAS ANO-RCC library: ANO-RCC-VTZP for magnetic center ion Co<sup>II</sup>; VTZ for close Br, Cl and P atoms; VDZ for distant atoms. The calculations employed the second order Douglas-Kroll-Hess Hamiltonian, where scalar relativistic contractions were taken into account in the basis set. The active electrons in 5+5' active orbitals include all d electrons (CAS(7 in 5+5')) in the CASSCF calculations. To exclude all the doubts, we calculated all the roots in the active orbitals. The effect of the dynamical electronic correlation was applied using CASPT2 based on the first CASSCF calculation. After that, the spin-orbit coupling was handled separately in the restricted active space state interaction (RASSI-SO)

procedure.<sup>5,6</sup> We have mixed the maximum number of spin-free state which was possible with our hardware (all from 10 quadruplets and 40 doublets). SINGLE\_ANISO<sup>7-9</sup> program was used to obtain zero-field splitting parameters  $D(E)$  ( $\text{cm}^{-1}$ ),  $\mathbf{g}$  tensors, energy levels, magnetic axes, *et al.* based on the above CASPT2/RASSI-SO calculations.

To deeply analyze the magnetic anisotropy, ORCA 4.2 calculations<sup>10</sup> were performed with CASSCF, followed by N-electron valence second-order perturbation theory (NEVPT2). The spin-orbit coupling (SOC) operator used was the efficient implementation of the multicenter spin-orbit mean-field (SOMF) concept developed by Hess et al.<sup>6</sup> The spin-spin contributions (SSC) to the  $D$  values were also included although they are very small for our complexes. The NEVPT2<sup>11-14</sup> calculation with seven 3d electrons in five Co 3d-based orbitals (CAS(7, 5)). In the calculations, the orbitals were determined for the average of 10  $S = 3/2$  and 40  $S = 1/2$  roots. All calculations were performed with triple- $\zeta$  with one polarization function def2-TZVP<sup>15-17</sup> basis set for all atoms.



**Table S6** Calculated spin-free energies ( $\text{cm}^{-1}$ ) of the lowest ten terms ( $S = 3/2$ ) of **1** and **2** using CASPT2/RASSI-SO with MOLCAS 8.4.

| spin-free states | <b>1</b>           | <b>2</b>           |
|------------------|--------------------|--------------------|
|                  | $E/\text{cm}^{-1}$ | $E/\text{cm}^{-1}$ |
| 1                | 0.0                | 0.0                |
| 2                | 2817.1             | 2684.3             |
| 3                | 3209.6             | 3174.9             |
| 4                | 3616.5             | 3290.2             |
| 5                | 4091.9             | 3654.0             |
| 6                | 8444.8             | 7742.8             |
| 7                | 8446.9             | 7747.4             |
| 8                | 16389.8            | 16959.3            |
| 9                | 16403.9            | 16994.2            |
| 10               | 19328.5            | 18823.7            |

**Table S7** Calculated weights of the five most important spin-orbit-free states for the lowest two spin-orbit states of **1** and **2** using CASPT2/RASSI-SO with MOLCAS 8.4.

|          | Spin-orbit states | Energy ( $\text{cm}^{-1}$ ) | Spin-free states, Spin, Weights |              |              |              |              |
|----------|-------------------|-----------------------------|---------------------------------|--------------|--------------|--------------|--------------|
|          |                   |                             |                                 |              |              |              |              |
| <b>1</b> | 1                 | 0.0                         | 1,1.5,0.9580                    | 3,1.5,0.0171 | 4,1.5,0.0106 | 2,1.5,0.0102 | 5,1.5,0.0019 |
|          | 2                 | 78.2                        | 1,1.5,0.9728                    | 3,1.5,0.0091 | 2,1.5,0.0084 | 4,1.5,0.0073 | 5,1.5,0.0013 |
| <b>2</b> | 1                 | 0.0                         | 1,1.5,0.9580                    | 3,1.5,0.0178 | 4,1.5,0.0166 | 2,1.5,0.0038 | 5,1.5,0.0019 |
|          | 2                 | 63.6                        | 1,1.5,0.9690                    | 2,1.5,0.0101 | 4,1.5,0.0096 | 3,1.5,0.0089 | 5,1.5,0.0012 |

**Table S8** Contributions of the excited states (with relative energy  $\text{cm}^{-1}$ ) to  $D$  and  $E$  values ( $\text{cm}^{-1}$ )for **1** and **2** using NEVPT2 with ORCA 4.2.

| Fragments | State No. | Mult | Energy, $\text{cm}^{-1}$ | Contribution, $\text{cm}^{-1}$ |         |
|-----------|-----------|------|--------------------------|--------------------------------|---------|
|           |           |      |                          | $D$                            | $E$     |
| <b>1</b>  | 1         | 4    | 2923.4                   | -10.039                        | 0.000   |
|           | 2         | 4    | 2972.8                   | 16.636                         | 15.973  |
|           | 3         | 4    | 2974.4                   | 16.618                         | -15.973 |
| <b>2</b>  | 1         | 4    | 2384.2                   | -12.687                        | 0.000   |
|           | 2         | 4    | 2705.1                   | 16.733                         | 16.629  |
|           | 3         | 4    | 2707.0                   | 16.718                         | -16.629 |

**Table S9** Relative energies ( $\text{cm}^{-1}$ ) of ligand field one-electron states (in the basis of d-AOs) of **1** and **2** from AILFT analysis using NEVPT2 with ORCA 4.2.

| Fragments | No. | LF one-electron state                          | Energy, $\text{cm}^{-1}$ |
|-----------|-----|------------------------------------------------|--------------------------|
| <b>1</b>  | 1   | $0.97 d_{yz} - 0.15 d_{xy} - 0.15 d_{x^2-y^2}$ | 0.0                      |
|           | 2   | $0.97 d_{xz} - 0.16 d_{xy} + 0.15 d_{x^2-y^2}$ | 2.1                      |
|           | 3   | $0.94 d_{xy} + 0.27 d_{x^2-y^2}$               | 3761.4                   |
|           | 4   | $-0.94 d_{x^2-y^2} + 0.27 d_{xy}$              | 3763.9                   |
|           | 5   | $1.00 d_{z^2}$                                 | 3933.5                   |
| <b>2</b>  | 1   | $-0.97 d_{yz} - 0.24 d_{x^2-y^2}$              | 0.0                      |
|           | 2   | $0.97 d_{xz} + 0.24 d_{xy}$                    | 1.9                      |
|           | 3   | $0.95 d_{xy} - 0.23 d_{xz}$                    | 3094.6                   |
|           | 4   | $0.95 d_{x^2-y^2} - 0.23 d_{yz}$               | 3096.5                   |
|           | 5   | $1.00 d_{z^2}$                                 | 3929.6                   |

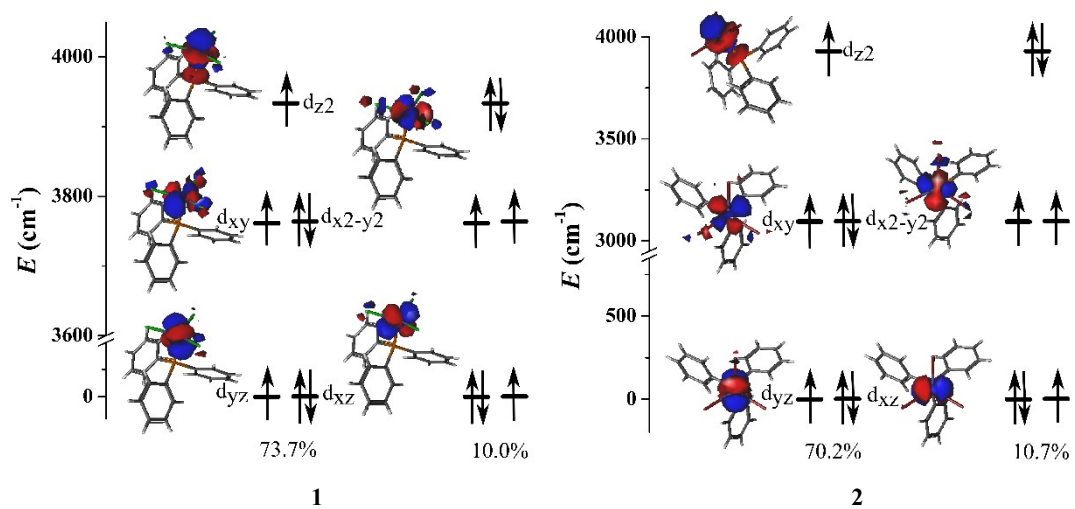

**Fig. S13** Orbital energies computed for the ground states of **1** and **2** using NEVPT2 with ORCA

4.2. The percentage mention reveals the percent of the corresponding configuration mixing.

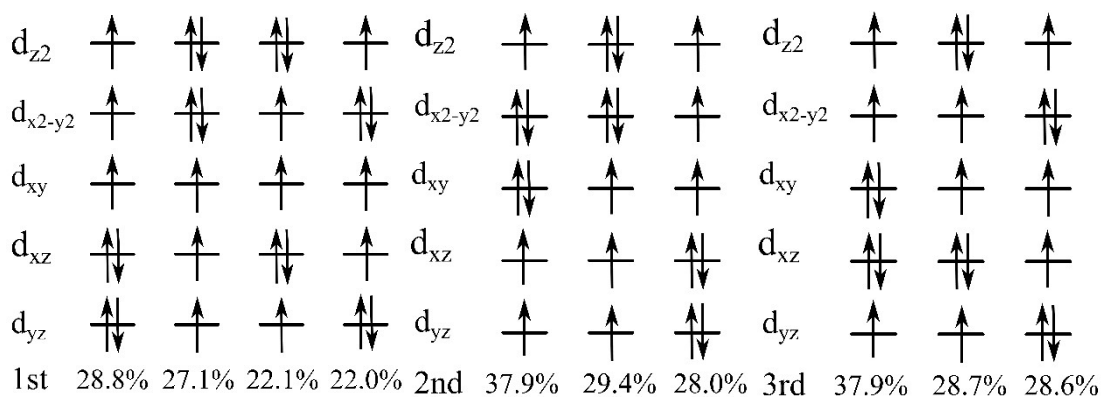

1

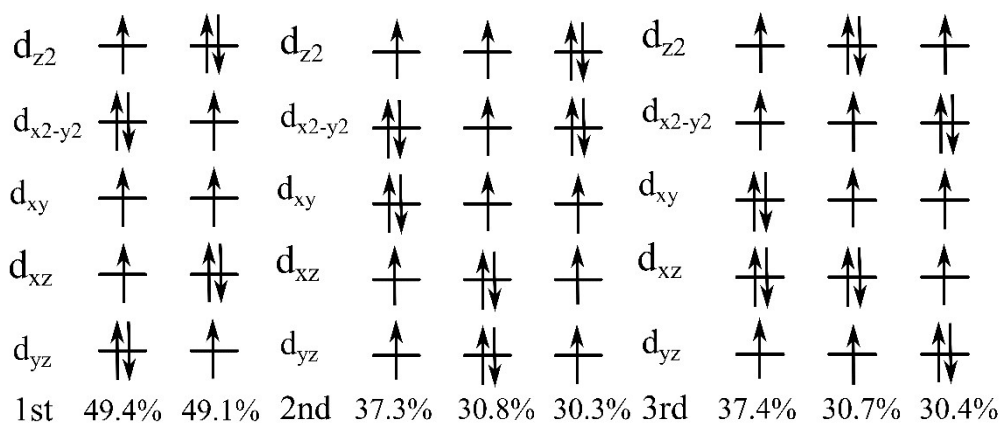

2

**Fig. S14** Multi-determinant wavefunction of the selected excited states having important contributions to  $D$  tensor for **1** and **2**. The computed CI coefficients that are larger than 10% are shown above.

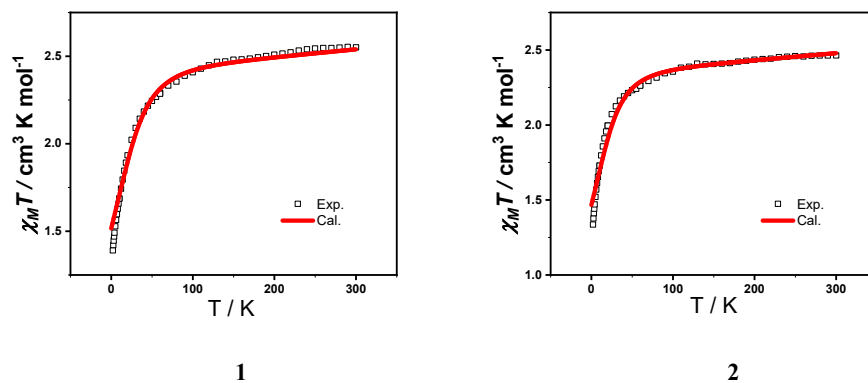

**Fig. S15** Comparisons of the calculated (solid line) and the experimental magnetic susceptibilities for 1–2.

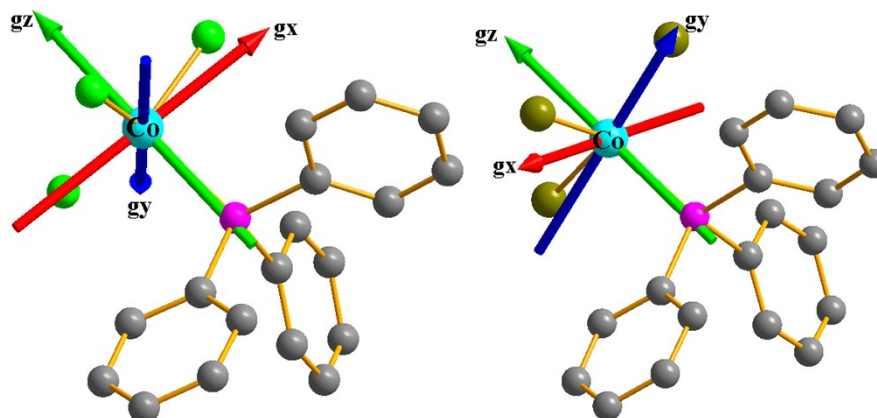

**Fig. S16** Orientations of the local magnetic axes (red:  $g_x$ ; blue:  $g_y$ ; green:  $g_z$ ) on  $\text{Co}^{\text{II}}$  ions of 1 and 2 in their ground spin-orbit states using CASPT2/RASSI-SO with MOLCAS 8.4.

## Notes and references

1. M. Llunell, D. Casanova, J. Cirera, P. Alemany and S. Alvarez, *Shape Program Vision* 2.1, 2013.
2. S. Alvarez, P. Alemany, D. Casanova, J. Cirera, M. Llunell and D. Avnir, *Coord. Chem. Rev.*, 2005, **249**, 1693-1708.
3. N. F. Chilton, R. P. Anderson, L. D. Turner, A. Soncini and K. S. Murray, *J. Comput. Chem.*, 2013, **34**, 1164-75.
4. F. Aquilante, J. Autschbach, R. K. Carlson, L. F. Chibotaru, M. G. Delcey, L. De Vico, I. Fdez Galván, N. Ferré, L. M. Frutos, L. Gagliardi, M. Garavelli, A. Giussani, C. E. Hoyer, G. Li Manni, H. Lischka, D. Ma, P. Malmqvist, T. Müller, A. Nenov, M. Olivucci, T. B. Pedersen, D. Peng, F. Plasser, B. Pritchard, M. Reiher, I. Rivalta, I. Schapiro, J. Segarra-Martí, M. Stenrup, D. G. Truhlar, L. Ungur, A. Valentini, S. Vancoillie, V. Veryazov, V. P. Vysotskiy, O. Weingart, F. Zapata and R. Lindh, *J. Comput. Chem.*, 2016, **37**, 506-541.
5. P. Å. Malmqvist, B. O. Roos and B. Schimmelpfennig, *Chem. Phys. Letters*, 2002, **357**, 230-240.
6. B. A. Heß, C. M. Marian, U. Wahlgren and O. Gropen, *Chem. Phys. Letters*, 1996, **251**, 365-371.
7. L. F. Chibotaru, L. Ungur and A. Soncini, *Angew. Chem. Int. Ed.*, 2008, **47**, 4126-4129.
8. L. Ungur, W. Van den Heuvel and L. F. Chibotaru, *New J. Chem.*, 2009, **33**, 1224-1230.
9. L. F. Chibotaru, L. Ungur, C. Aronica, H. Elmoll, G. Pilet and D. Luneau, *J. Am. Chem. Soc.*, 2008, **130**, 12445-12455.
10. F. Neese, *Max-Planck institute for bioinorganic chemistr*, Mülheim an der Ruhr, Germany, 2019.
11. C. Angeli, R. Cimiraglia and J. P. Malrieu, *J. Chem. Phys.*, 2002, **117**, 9138-9153.
12. C. Angeli, R. Cimiraglia and J.-P. Malrieu, *Chem. Phys. Letters*, 2001, **350**, 297-305.
13. C. Angeli and R. Cimiraglia, *Theor. Chem. Acc.*, 2002, **107**, 313-317.
14. C. Angeli, R. Cimiraglia, S. Evangelisti, T. Leininger and J. P. Malrieu, *J. Chem. Phys.*, 2001, **114**, 10252-10264.
15. A. Schäfer, C. Huber and R. Ahlrichs, *J. Chem. Phys.*, 1994, **100**, 5829-5835.
16. A. Schäfer, H. Horn and R. Ahlrichs, *J. Chem. Phys.*, 1992, **97**, 2571-2577.

17. F. Weigend and R. Ahlrichs, *Phys. Chem. Chem. Phys.*, 2005, **7**, 3297-3305.
18. O. Y. Vassilyeva, E. A. Buvaylo, V. N. Kokozay, B. W. Skelton, C. Rajnak, J. Titiš and R. Boca, *Dalton Trans*, 2019, **48**, 11278-11284.
19. J. M. Zadrozny, J. Liu, N. A. Piro, C. J. Chang, S. Hill and J. R. Long, *Chem. Commun.*, 2012, **48**, 3927-3929.
20. K. A. Schulte, K. R. Vignesh and K. R. Dunbar, *Chem. Sci.*, 2018, **9**, 9018-9026.
21. S. Gomez-Coca, E. Cremades, N. Aliaga-Alcalde and E. Ruiz, *J. Am. Chem. Soc.*, 2013, **135**, 7010-7018.
22. D. Pinkowicz, F. J. Birk, M. Magott, K. Schulte and K. R. Dunbar, *Chem. Eur. J.*, 2017, **23**, 3548-3552.
23. F. Yang, Q. Zhou, Y. Zhang, G. Zeng, G. Li, Z. Shi, B. Wang and S. Feng, *Chem Commun*, 2013, **49**, 5289-91.
24. R. Boča, J. Miklovič and J. Titiš, *Inorg. Chem.*, 2014, **53**, 2367-2369.
25. M. R. Saber and K. R. Dunbar, *Chem Commun*, 2014, **50**, 12266-9.
26. C. Rajnák, A. Packová, J. Titiš, J. Miklovič, J. Moncol' and R. Boča, *Polyhedron*, 2016, **110**, 85-92.
27. Y.-Q. Zhai, Y.-F. Deng and Y.-Z. Zheng, *Dalton Trans.*, 2018, **47**, 8874-8878.
28. A. K. Mondal, M. Sundararajan and S. Konar, *Dalton Trans*, 2018, **47**, 3745-3754.
29. J. Hruby, D. Dvorak, L. Squillantini, M. Mannini, J. van Slageren, R. Herchel, I. Nemeč and P. Neugebauer, *Dalton Trans.*, 2020, **49**, 11697-11707.
